1 ***me31B* regulates stem cell homeostasis by preventing excess dedifferentiation in**  
2 **the *Drosophila* male germline**

3

4 Lindy Jensen<sup>1</sup>, Zsolt G. Venkei<sup>2</sup>, George J. Watase<sup>2, 3</sup>, Bitarka Bisai<sup>1</sup>, Scott Pletcher<sup>1</sup>,  
5 Cheng-Yu Lee<sup>1</sup>, Yukiko M. Yamashita<sup>2,3, \*</sup>

6 <sup>1</sup> Life Sciences Institute, Department of Molecular and Integrative Physiology, University  
7 of Michigan Ann Arbor

8 <sup>2</sup> Whitehead Institute for Biomedical Research, Massachusetts Institute of Technology,  
9 Department of Biology

10 <sup>3</sup> Howard Hughes Medical Institute

11

12 **Short title: Dedifferentiation in *Drosophila* male germline**

13

14 \* Corresponding author: [yukikomy@wi.mit.edu](mailto:yukikomy@wi.mit.edu)

15

16 **Abstract**

17 Tissue-specific stem cells maintain tissue homeostasis by providing a continuous supply  
18 of differentiated cells throughout the life of organisms. Differentiated/differentiating cells  
19 can revert back to a stem cell identity via dedifferentiation to help maintain the stem cell  
20 pool beyond the lifetime of individual stem cells. Although dedifferentiation is important  
21 to maintain the stem cell population, it is speculated to underlie tumorigenesis.  
22 Therefore, this process must be tightly controlled. Here we show that a translational  
23 regulator *me31B* plays a critical role in preventing excess dedifferentiation in the  
24 *Drosophila* male germline: in the absence of *me31B*, spermatogonia (SGs)  
25 dedifferentiate into germline stem cells (GSCs) at a dramatically elevated frequency.  
26 Our results show that the excess dedifferentiation is likely due to misregulation of *nos*, a  
27 key regulator of germ cell identity and GSC maintenance. Taken together, our data  
28 reveal negative regulation of dedifferentiation to balance stem cell maintenance with  
29 differentiation.

30

## 31 Introduction

32 Tissue-specific adult stem cells play a critical role in sustaining tissue  
33 homeostasis by continuously providing differentiated cells throughout the life of  
34 organisms (He et al., 2009; Nystul and Spradling, 2006). The loss of stem cells or their  
35 functions underlie tissue degeneration under physiological and pathological conditions.  
36 The stem cell pool is primarily maintained by self-renewal. However, dedifferentiation, a  
37 process whereby differentiated and/or differentiating cells revert back to a stem cell  
38 identity, also helps to maintain the stem cell population beyond the lifetime of individual  
39 stem cells (de Sousa and de Sauvage, 2019; Merrell and Stanger, 2016). However, the  
40 misregulation of dedifferentiation has been implicated to underlie tumorigenesis  
41 (Landsberg et al., 2012; Schwitalla et al., 2013). Therefore, dedifferentiation must be  
42 tightly controlled to ensure stem cell maintenance, while preventing transformation.  
43 However, the molecular mechanisms that regulate dedifferentiation are not well  
44 understood.

45  
46 The *Drosophila* testis serves as an excellent model system to study  
47 dedifferentiation. Notably, this model offers unambiguous identification of stem cells  
48 (germline stem cells (GSCs)) and their differentiating progeny (Fuller and Spradling,  
49 2007; Yamashita, 2018). GSCs are attached to post-mitotic somatic hub cells, which  
50 function as a major component of the stem cell niche (Figure 1A). The hub cells secrete  
51 two major signaling ligands that promote GSC self-renewal: a cytokine-like ligand Upd  
52 that activates the JAK-STAT pathway, and a BMP ligand Dpp that activates the  
53 downstream Tkv receptor to specify stem cell identity (Kawase et al., 2004; Kiger et al.,  
54 2001; Schulz et al., 2004; Shivdasani and Ingham, 2003; Tulina and Matunis, 2001).  
55 Upon GSC divisions, daughter cells that are displaced away from the hub initiate  
56 differentiation as gonialblasts (GBs), which then continue with proliferative mitotic  
57 divisions (or transit-amplifying divisions) as spermatogonia (SGs) before entering  
58 meiotic program. SG divisions are characterized by incomplete cytokinesis, connecting  
59 all sister cells as a cluster (i.e. cyst). A membranous organelle called the fusome runs  
60 through the stabilized contractile ring, called ring canals (Figure 1A) (Yamashita, 2018).

61  
62 Although GSCs are maintained relatively stably through consistent asymmetric  
63 divisions, which generate one GSC and one GB (Yamashita et al., 2003), GSCs can  
64 occasionally be lost (Wallenfang et al., 2006). Upon GSC loss, SGs can respond to  
65 niche vacancy, and dedifferentiate to replenish the GSC pool. During dedifferentiation of  
66 SGs, the fusome that connects SGs fragments into a more spherical structure, referred  
67 to as 'spectrosome' as typically observed in GSCs (Figure 1A) (Brawley and Matunis,  
68 2004). Fragmenting fusomes in >2 cell SGs are observed only during dedifferentiation,  
69 not during differentiation, and these features can be used to unambiguously identify  
70 dedifferentiating SGs without lineage tracing (Brawley and Matunis, 2004; Sheng et al.,

71 2009; Sheng and Matunis, 2011). Dedifferentiation was first shown in an experiment  
72 that artificially removed all GSCs via overexpression of Bam, a master regulator of  
73 differentiation (Brawley and Matunis, 2004; Sheng et al., 2009; Sheng and Matunis,  
74 2011). While temporally controlled overexpression of Bam induced all GSCs to  
75 differentiate, withdrawal of Bam allowed SGs to repopulate the stem cell niche and  
76 produced GSCs. Subsequently, it was shown that SG dedifferentiation occurs naturally  
77 and increases during aging in unperturbed tissues (Cheng et al., 2008), suggesting that  
78 dedifferentiation is likely a mechanism that helps to maintain the GSC population  
79 throughout the lifetime of organisms, particularly with age. More recent work showed  
80 that dedifferentiation is important to sustain the GSC population under conditions that  
81 repeatedly induce GSC replenishment and challenge tissue homeostasis, such as  
82 cycles of starvation and refeeding (Herrera and Bach, 2018). SG dedifferentiation under  
83 these conditions required JNK signaling (Herrera and Bach, 2018). However, whether  
84 mechanisms exist to prevent excess dedifferentiation remain poorly understood.

85  
86 *Maternally expressed at 31B (me31B)* encodes an RNA helicase of the DEAD-  
87 box family that regulates translation (Kugler et al., 2009; Kugler and Lasko, 2009;  
88 Nakamura et al., 2001). In particular, Me31B silences the translation of oocyte-localizing  
89 mRNAs, such as *oskar*, in nurse cells prior to their transport to the oocyte (McDermott  
90 et al., 2012; Nakamura et al., 2001). Me31B was also shown to repress translation of  
91 *nanos (nos)* (Gotze et al., 2017; Jeske et al., 2011), a translational regulator that is  
92 critical for germ cell specification and maintenance of GSCs (Li et al., 2009; Wang and  
93 Lin, 2004). Here, we show that *me31B* is a critical negative regulator of dedifferentiation  
94 in the *Drosophila* testis. In the absence of *me31B*, SGs frequently dedifferentiated even  
95 in the absence of known triggers, such as the induced removal of GSCs. We further  
96 show that *me31B* represses SG dedifferentiation by repressing *nos*. Our study reveals  
97 that dedifferentiation is actively repressed under normal conditions, likely to protect the  
98 native GSC population, and identifies *me31B* as a previously unknown negative  
99 regulator of dedifferentiation.

100

## 101 **Materials and Methods**

### 102 ***Fly husbandry and strains***

103 Unless otherwise stated, all flies were raised on standard Bloomington medium at 25°,  
104 and young flies (1- to 3-day-old adults) were used for all experiments. See [Supplementary](#)  
105 [Table S1](#) for the list of stocks used in this study.

106

### 107 ***Immunofluorescence staining and microscopy***

108 For *Drosophila* tissues, immunofluorescence staining was performed as described  
109 previously (Cheng et al., 2008). Briefly, tissues were dissected in the phosphate-  
110 buffered saline (PBS), transferred to 4% formaldehyde in PBS and fixed for 30 min.  
111 Tissues were then washed in PBS-T (PBS containing 0.1% Triton-X) for at least 30 min

112 (three 10 min washes), followed by incubation with primary antibody in 3% bovine  
113 serum albumin (BSA) in PBS-T at 4°C overnight. Samples were washed for 60 min  
114 (three 20 min washes) in PBS-T, incubated with secondary antibody in 3% BSA in PBS-  
115 T at 4°C overnight, washed as above, and mounted in VECTASHIELD with DAPI  
116 (Vector Labs). The antibodies used are described in [Supplementary Table S2](#). Images  
117 were taken using a Leica TCS SP8 confocal microscope with 63x oil-immersion  
118 objectives (NA = 1.4). Images were processed using Adobe Photoshop and ImageJ  
119 software. Dedifferentiating cysts were identified as a cluster of at least 3 germ cells that  
120 are clearly connected by fragmenting fusome and attached to the hub. Significance was  
121 determined using a Fischer's Exact Test in comparison to a control.

122

### 123 ***RNA Fluorescent in situ hybridization***

124 To detect *nos* mRNA, single molecule fluorescent in situ hybridization (smFISH) was  
125 conducted by following a previously described protocol (Fingerhut et al., 2019). All  
126 solutions used for smFISH were RNase free. Testes from 2–3 day old flies were  
127 dissected in 1X PBS and fixed in 4% formaldehyde in 1X PBS for 30 minutes. Then  
128 testes were washed briefly in PBS before being rinsed with wash buffer (2X saline-  
129 sodium citrate (SSC), 10% formamide) and then hybridized overnight at 37°C in  
130 hybridization buffer (2X SSC, 10% dextran sulfate (sigma, D8906), 1mg/mL E. coli tRNA  
131 (sigma, R8759), 2mM Vanadyl Ribonucleoside complex (NEB S142), 0.5% BSA  
132 (Ambion, AM2618), 10% formamide). Following hybridization, samples were washed  
133 three times in wash buffer for 20 minutes each at 37°C and mounted in VECTASHIELD  
134 with DAPI (Vector Labs). Images were acquired using an upright Leica TCS SP8  
135 confocal microscope with a 63X oil immersion objective lens (NA = 1.4) and processed  
136 using Adobe Photoshop and ImageJ software. Fluorescently labeled probes were  
137 added to the hybridization buffer to a final concentration of 50nM (for satellite DNA  
138 transcript targeted probes). Probe set against *nos* exons was designed using the  
139 Stellaris® RNA FISH Probe Designer (Biosearch Technologies, Inc.) available online  
140 at [www.biosearchtech.com/stellarisdesigner](http://www.biosearchtech.com/stellarisdesigner). The Stellaris® RNA FISH (Biosearch  
141 Technologies, Inc.) probes were labeled with Quasar 670. Probe set was added to the  
142 hybridization buffer in 50nM final concentration. For smFISH probe sequences see  
143 [Supplementary Table S3](#).

144

### 145 ***RNA immunoprecipitation (RIP)-qPCR***

146 Samples were collected from two genotypes, a control (*nos-gal4>UAS-GFP, UAS-dpp*)  
147 and an experimental (*nos-gal4>UAS-dpp, me31B-GFP*) and processed in pairs. Dpp  
148 overexpression (*UAS-dpp*) was introduced to increase SGs in the sample. ~200 testes  
149 per sample were collected into RNase-free PBS, frozen in liquid nitrogen after removing  
150 excess liquid, and stored at -80°C until extraction. Lysis was completed by grinding the  
151 tissue in 400 µL of lysis buffer (150 mM KCl, 20 mM HEPES pH 7.4, 1mM MgCl<sub>2</sub> with 1x  
152 c0mplete™ EDTA-free Protease Inhibitor Cocktail and 1U/µl RNasin® Plus RNase

153 Inhibitor from Promega added right before the use) and incubating for 30 minutes on ice  
154 with pipetting every 10 minutes. After centrifugation at 12,000xg for 5 minutes, pelleted  
155 cell debris were discarded. At this point, a 10% pre-IP input sample was removed and  
156 saved to serve as a control. For precipitation of Me31B-GFP and control GFP, GFP-  
157 conjugated magnetic beads were prepared by incubating 10 µg of mouse anti-GFP  
158 antibodies (Fisher Scientific) with 50 µL of Protein G Dynabeads™ in 200 µL of Ab  
159 Binding and Washing Buffer (provided in the kit) for 10 min at room temperature on a  
160 rotator. After antibody conjugation, beads were magnetically separated and washed  
161 once with 200 µL of Ab Binding and Washing Buffer. The antibody-conjugated beads  
162 were then incubated with the lysate for 10 minutes at room temperature (samples tubes  
163 were tumbled end-over-end during incubation). After magnetic separation of the beads,  
164 10% of the supernatant was taken as non-bound fraction sample. The beads were  
165 washed with the Dynabeads Protein G kit Washing Buffer 3 times, and were  
166 resuspended in TRIzol (the 10% pre-IP and 10% post-IP samples were also processed  
167 with TRIzol at this time) according to the manufacturer's instructions. cDNA was  
168 generated using SuperScript III® Reverse Transcriptase (Invitrogen) followed by qPCR  
169 using *Power SYBR Green* reagent (Applied Biosystems). 10% inputs were diluted to a  
170 1% input before RT was run. The fold enrichment was calculated by the  $\Delta\Delta Ct$  method.  
171 First, Ct values from each IP sample were normalized to their respective 1% input for  
172 each primer ( $\Delta Ct$ ) to account for RNA sample preparation differences.

$$\Delta Ct [\text{normalized RIP}] = Ct [\text{RIP}] - (Ct [\text{Input}] - \text{Log}_2 100)$$

174 Then, the  $\Delta\Delta Ct$  (Me31B-GFP/control GFP) was obtained to compare these normalized  
175 values between the Me31B-GFP sample versus the UAS-GFP control for each primer  
176 set.

$$\Delta\Delta Ct [\text{Me31B-GFP/control GFP}] = \Delta Ct [\text{normalized Me31B-GFP RIP}] - \Delta Ct [\text{normalized control GFP RIP}]$$

179 Finally, the fold enrichment was obtained by the following formula.

$$\text{Fold enrichment} = 2^{-\Delta\Delta Ct}$$

181 Experiments were done in technical triplicates with three biological replicates. Primers  
182 used are the following: *rp49*, forward 5'-TACAGGCCCAAGATCGTGAA-3', reverse 5'-  
183 TCTCCTTGCGCTTCTTGGGA-3'. *nanos* set #1, forward 5'-  
184 CAGTACCACTACCACTTGCTG-3', reverse 5'-AAAGATTTTCAAGGATCGCGC-3'.  
185 *Nanos* set #2, forward 5'-CACCGCCAATTCGCTCCTTAT-3', reverse 5'-  
186 GCTGGTGA CTGCACTAGC-3'. *bam*, forward 5'-TGACGTTACTGCACCACTCC-3',  
187 reverse 5'-CGAACAGATAGTCCGAGGGC-3'.

188

## 189 Results

### 190 *me31B* prevents excess dedifferentiation of SGs in *Drosophila* testes.

191 To study the role of *me31B* in the testis, we used two independent RNAi  
192 constructs (*UAS-me31B<sup>TRIP.GL00695</sup>* and *UAS-me31B<sup>TRIP.HMS00539</sup>*, available from  
193 Bloomington Stock Center, see methods). Using these constructs and the *nos-gal4*  
194 driver, we knocked down *me31B* in germ cells ([Supplementary Figure S1](#), *nos-gal4*  
195 *>UAS-me31B<sup>TRIP.GL00695</sup>* and *nos-gal4>UAS-me31B<sup>TRIP.HMS00539</sup>*, hereafter  
196 *nos>me31B<sup>TRIP.GL00695</sup>* and *nos>me31B<sup>TRIP.HMS00539</sup>*, respectively, or simply  
197 *nos>me31B<sup>RNAi</sup>* as essentially the same results were obtained with both RNAi

198 constructs). We found that Me31B-GFP was expressed in both germline and somatic  
199 cells in the testis, and the GFP signal was substantially reduced in the germline upon  
200 expression of the RNAi construct using *nos-gal4*, confirming the efficiency of these  
201 RNAi constructs (Supplementary Figure S1). Although Me31B has been reported to be  
202 a component of nuage (germ granules) (DeHaan et al., 2017; Liu et al., 2011; Thomson  
203 et al., 2008), we observed diffuse cytoplasmic localization of Me31B-GFP in germ cells  
204 in the adult testis and Me31B-GFP did not co-localize with the nuage marker Vasa in  
205 control flies. Moreover, *me31B* knockdown did not affect nuage morphology  
206 (Supplementary Figure S1).

207  
208 As expected, GSCs in control testes surrounded the hub and were either single  
209 cells or connected to their immediate daughter cells (GBs) prior to completion of  
210 cytokinesis (Figure 1B). Intriguingly, *nos>me31B<sup>RNAi</sup>* testes often contained SG cysts  
211 that were attached to the hub cells, as opposed to control testes where only single cells  
212 (GSCs) or doublets (GSC-GB pairs) were attached to the hub (Figure 1B). Their identity  
213 as SG cysts is based on the fact that they contained  $\geq 3$  germ cells that were connected  
214 to each other (Figure 1C-D). The fusomes in these SG cysts at the hub in  
215 *nos>me31B<sup>RNAi</sup>* testes were fragmented (Figure 1C-D), a well-established hallmark of  
216 dedifferentiating SGs (Brawley and Matunis, 2004; Sheng et al., 2009; Sheng and  
217 Matunis, 2011), rather than continuous as in differentiating SGs (Figure 1E). We  
218 observed dedifferentiating SG cysts, identified by their fragmented fusomes and  
219 attachment to the hub, in about 80% of *nos>me31B<sup>RNAi</sup>* testes but not in any control  
220 testes (Figure 1F). The number of SGs within dedifferentiating SG cysts was not always  
221  $2^n$ : often they contained 3 SGs, indicating that some SGs might have already  
222 dedifferentiated into single GSCs or died during dedifferentiation.

223  
224 We considered two possibilities that could explain this phenotype. First, *me31B*  
225 may be required in SGs to directly prevent their dedifferentiation. In addition, *me31B*  
226 may be required to maintain GSCs in the niche, which would indirectly prevent SG  
227 dedifferentiation. To determine if *me31B* acts directly in SGs, we used the *bam-gal4*  
228 driver to deplete *me31B* only in the 4-cell SG and later stages (Chen and McKearin,  
229 2003b). We found that about 50% of *bam>me31B<sup>RNAi</sup>* testes displayed SG cysts with  $\geq 3$   
230 germ cells attached to the hub cells and fragmented fusomes (Figure 1D, F). These  
231 results demonstrate that *me31B* is required in SGs in a cell autonomous manner to  
232 prevent their dedifferentiation; however, we note that the frequency of dedifferentiation  
233 is higher when RNAi constructs were driven by *nos-gal4* than by *bam-gal4*, suggesting  
234 that *me31B* may have additional functions in early germ cells to prevent  
235 dedifferentiation (see below).

236  
237 **Dedifferentiating SGs activate BMP signaling.**

238 GSC identity in the *Drosophila* testis is specified by JAK-STAT and BMP  
239 signaling (Kawase et al., 2004; Kiger et al., 2001; Schulz et al., 2004; Shivdasani and  
240 Ingham, 2003; Tulina and Matunis, 2001). We examined whether the activation of these  
241 pathways was altered upon knockdown of *me31B*.

242  
243 We found that GSCs in *bam>me31B<sup>RNAi</sup>* testes had similar STAT expression as  
244 control testes ([Supplementary Figure S2C-D](#)), suggesting that dedifferentiation induced  
245 in *bam>me31B<sup>RNAi</sup>* testes is not due to altered STAT signaling. Importantly, when a cyst  
246 of dedifferentiating *bam>me31B<sup>RNAi</sup>* SGs was attached to the hub cells, only the germ  
247 cells that were in direct contact with the hub had high STAT levels ([Supplementary](#)  
248 [Figure S2D](#), arrow). Thus, our data suggest that deregulation STAT signaling cannot  
249 explain the enhanced dedifferentiation upon knockdown of *me31B*, and that *me31B* acts  
250 independently of STAT activation in SGs to prevent their dedifferentiation. Additionally,  
251 these results indicate that germ cells in  $\geq 4$ -cell SG cysts can reestablish STAT signaling  
252 upon homing into the niche during dedifferentiation triggered by depletion of *me31B*.  
253 Although downregulation of JAK-STAT signaling is reported to prevent SG  
254 dedifferentiation (Sheng et al., 2009), our data suggest that the dedifferentiation induced  
255 by depletion of *me31B* does not directly involve activation the JAK-STAT pathway. We  
256 speculate that JAK-STAT signaling might help maintain GSCs that were generated by  
257 dedifferentiation, instead of inducing dedifferentiation *per se*. However, STAT  
258 expression was reduced in GSCs of the *nos>me31B<sup>RNAi</sup>* testes compared to controls  
259 ([Supplementary Figure S2A-B](#)), suggesting that *me31B* has an additional role in GSCs  
260 to maintain STAT activation. Reduced STAT in *nos>me31B<sup>RNAi</sup>* testes may explain why  
261 we observe a higher frequency of dedifferentiation with *nos-gal4*-driven knockdown of  
262 *me31B* compared to *bam-gal4*-driven knockdown of *me31B* ([Figure 1F](#)).

263  
264 In wild-type testes, activation of BMP signaling triggers phosphorylation of Mad  
265 (pMad) in GSCs and in GBs that are still connected to GSCs (Kawase et al., 2004)  
266 ([Figure 2A](#)). We found that knockdown of *me31B*, either by *nos-gal4* or *bam-gal4*,  
267 resulted in a high pMad signal in germ cells outside GSCs and GBs ([Figure 2B, C](#)).  
268 Moreover, in *me31B* knockdown testes, we observed high pMad signal in all the germ  
269 cells within a dedifferentiating SG cyst attached to the hub ([Figure 2B, C](#)) and even in  
270 SGs that were not yet attached to the hub ([Figure 2B](#)). We observed pMad-positive  
271 germ cells outside the niche in only 7.7% of control testis (n=39 testes), but in over 50%  
272 of *me31B* knockdown testes (91.7% in *nos>me31B<sup>TRIP.HMS00539</sup>*, n=48, 66.7% in  
273 *nos>me31B<sup>TRIP.GL00695</sup>*, n=18, 58.8% in *bam>me31B<sup>TRIP.HMS00539</sup>*, n=34, 54.8% in  
274 *bam>me31B<sup>TRIP.GL00695</sup>*, n=31). These results indicate that the activation of BMP  
275 signaling precedes the re-acquisition of GSC identity during dedifferentiation due to  
276 *me31B* depletion, and may mediate dedifferentiation. Indeed, we found that  
277 overexpression of constitutively active Tkv (Tkv\*) (Nellen et al., 1996), the receptor of



278 BMP ligands, either by *nos-gal4* or *bam-gal4*, was sufficient to induce dedifferentiation  
279 (Figure 2D). Taken together, we propose that *me31B* may prevent dedifferentiation of  
280 SGs by directly or indirectly downregulating BMP signaling.

281

### 282 **Knockdown of *me31B* leads to misregulation of *nos* expression.**

283 Previous work showed that Me31B silences *nos* mRNA translation during  
284 embryonic development of *Drosophila* (Gotze et al., 2017; Jeske et al., 2011). In the  
285 adult germline, Nos instructs germ cell identity and GSC maintenance via translational  
286 repression of critical targets, such as Bam (Li et al., 2009; Wang and Lin, 2004) and a  
287 regulatory feedback exists between *nos*, Mad and *bam* controls germ cell differentiation  
288 (Harris et al., 2011).

289

290 To investigate whether Me31B might regulate *nos* mRNA translation during  
291 spermatogenesis, we examined Nos protein levels upon knockdown of *me31B*. In  
292 control testis, we detected Nos protein in early-stage germ cells (GSC to 4-cell stage  
293 SGs) (Figure 3A). In contrast, upon knockdown of *me31B* either by *nos-gal4* or *bam-*  
294 *gal4*, we observed Nos protein even in 8-cell SGs (Figure 3B, C, D), consistent with  
295 Me31B downregulating *nos* mRNA translation in the *Drosophila* testis. Nos and Bam, a  
296 master regulator of differentiation (McKearin and Ohlstein, 1995; McKearin and  
297 Spradling, 1990), are expressed in a reciprocal manner and act antagonistically in stem  
298 cell maintenance and differentiation in the *Drosophila* germline (Chen and McKearin,  
299 2005; Li et al., 2009). Indeed, *me31B* knockdown in the testes led to delayed Bam  
300 expression and a dramatic increase in the frequency of 4-cell SGs that lacked Bam  
301 protein (Supplementary Figure S3).

302

303 To determine if Me31b regulates *nos* mRNA levels, we utilized a system that  
304 allows a direct comparison of germ cells with and without knockdown of *me31B* within  
305 the same tissue. Briefly, we generated testes with germ cell clones that co-express  
306 *me31B<sup>RNAi</sup>* and GFP (*hs-FLP, nos-FRT-stop-FRT-gal4, UAS-GFP, UAS-me31B<sup>RNAi</sup>*), and  
307 detected *nos* mRNA by single molecule RNA *in situ* hybridization (see methods). We  
308 compared GFP<sup>+</sup> (*me31B<sup>RNAi</sup>*) vs. GFP<sup>-</sup> (control) germ cells within the same tissue and  
309 did not observe a detectable difference in the level of *nos* mRNA either in early germ  
310 cells (Figure 3E) or late SGs (Figure 3F), suggesting that *me31B* does not regulate *nos*  
311 mRNA levels. Taken together, these results suggest that Me31B regulates *nos* mRNA  
312 translation but not mRNA levels, consistent with other contexts where Me31B acts as a  
313 regulator of translation (Nakamura et al., 2001; Peter et al., 2019; Wang et al., 2017).

314

315 To determine if Me31B might regulate *nos* mRNA translation via direct binding,  
316 we performed RNA immunoprecipitation (RIP)-qPCR with testes expressing Me31B-  
317 GFP or GFP as a control (see methods). We found that *nos* mRNA co-

318 immunoprecipitated with Me31B-GFP (Figure 3G). Interestingly, *bam* mRNA also co-  
319 immunoprecipitated with Me31B-GFP (Figure 3G), implying that Me31B may directly  
320 regulate both *nos* and *bam*. These results indicate that *nos* mRNA is a direct target of  
321 Me31B in the testis, and identify *bam* mRNA as an additional target. Overall, we  
322 conclude that *me31B* prevents dedifferentiation of SGs by reducing Nos protein levels  
323 and increasing Bam protein levels.

324

### 325 ***nos* is necessary and sufficient for dedifferentiation.**

326 Based on the results above, we hypothesized that Me31B prevents  
327 dedifferentiation in late SGs by silencing *nos* mRNA translation. This hypothesis  
328 predicts that *nos* downregulation would rescue the elevated dedifferentiation caused by  
329 knockdown of *me31B*. Indeed, we found that simultaneous knockdown of *nos* and  
330 *me31B* greatly reduced dedifferentiation to the level of the wild type control (Figure 4A).  
331 These data suggest that *nos* is the main functional target of *me31B* in repressing  
332 dedifferentiation. To verify that the reduced dedifferentiation in the double knockdown  
333 lines is not due to the presence of two UAS-driven transgenes and dilution of the *gal4*  
334 driver, we tested a control genotype expressing *me31B<sup>RNAi</sup>* and a GFP transgene under  
335 the control of UAS. This genotype maintained the high frequency of dedifferentiation  
336 despite the presence of two UAS-driven transgenes (Figure 4A). Therefore, we infer  
337 that *nos* is necessary for the dedifferentiation induced by knockdown of *me31B*.

338

339 Moreover, we found that upregulation of *nos* was sufficient to induce  
340 dedifferentiation. Briefly, we employed a *nos* transgene in which the 3'UTR was  
341 replaced by the *tubulin* 3'UTR (*UAS-nos-tub3'UTR*), which disrupts the regulation of *nos*  
342 by translational repressors such as Me31B (Gavis and Lehmann, 1994). When the  
343 *UAS-nos-tub3'UTR* transgene was expressed with the *nos-gal4* driver, we found that  
344 ~40% of testes contained dedifferentiating SGs, as opposed to ~3% in control (Figure  
345 4B, C, D). Moreover, when the *UAS-nos-tub3'UTR* transgene was driven by *bam-gal4*,  
346 we observed an even higher frequency of dedifferentiation (~70%) (Figure 4B, E).  
347 These results suggest that upregulation of *nos* is sufficient to induce dedifferentiation.

348

349 Interestingly, when *me31B* knockdown was combined with *nos-tub3'UTR*  
350 expression under the control of the *nos-gal4* driver, it led to a near complete block of  
351 differentiation (*nos>nos-tub3'UTR, me31B<sup>TRIP.HMS00539</sup>*) (Figure 5). The differentiation  
352 block was so severe that our criteria of dedifferentiation used above (i.e. connected  
353 cells at the hub with fragmented fusomes) was not applicable: 29% of testes (n=45  
354 testes) contained SGs but never progressed to spermatocyte differentiation (which can  
355 be recognized by growth in cell size) (Figure 5B). In addition, 91% of testes (n=45  
356 testes) contained SG/SC cysts that contains  $\geq 32$  cells, further suggesting the failure in  
357 differentiation into spermatocyte stage (Figure 5C). These results may imply that

358 additional targets of *me31B* cooperate with misregulated *nos* to enhance the phenotype.  
359 Alternatively, further upregulation of endogenous *nos* due to *me31B* depletion and the  
360 *nos-tub3'UTR* transgene may enhance the effect.

361

### 362 **Nos expression is dynamically regulated at multiple levels during differentiation** 363 **in the male germline.**

364 Regulation of *nos* mRNA translation has been well documented and intensively  
365 studied, particularly in the context of germ cell specification (Gavis and Lehmann, 1992,  
366 1994; Kugler and Lasko, 2009). The regulation of mRNA translation is critically  
367 important during oocyte development: the mRNAs that specify germ cell fate in the  
368 embryos, including *nos* and *osk* mRNA, are transcribed in nurse cells, transported into  
369 developing oocytes, and stored in mature oocytes to be translated later (Lehmann,  
370 2016). Accordingly, mRNA synthesis (transcription) is spatially and temporally  
371 separated from protein production (translation), making it critically important to control  
372 the timing of translation by both translational repression and activation.

373

374 Whether *nos* transcription is spatiotemporally distinct from Nos protein production  
375 during the development of male germ cells in the testis is not known. To address this  
376 question, we generated a *nos* promoter reporter by driving a destabilized GFP  
377 (d2EGFP) fused to the *hsp70 3'UTR* from the *nos* promoter (Figure 6A). Because  
378 neither the mRNA nor protein products are stable in this reporter, the GFP signal closely  
379 recapitulates the activity of the promoter. Interestingly, we found that the *nos* promoter  
380 is active only in GSCs (and GBs that are still connected to GSCs (Figure 6B),  
381 suggesting that *nos* is transcribed only in these early germ cells. These data suggest  
382 that Nos protein, which is observed within GSCs through to 4-cell stage SGs, is  
383 primarily produced by translation of *nos* mRNA inherited by 2-cell SG and 4-cell SGs  
384 (Figure 6C). In addition, stable Nos protein generated in GSCs and GBs may contribute  
385 to its persistence through to the 4-cell SG stage.

386

387 These results reveal dynamic regulation of *nos* expression through multiple  
388 layers (Figure 6C): 1) GSCs and GBs actively transcribe *nos* mRNA, which is translated  
389 to produce Nos protein. 2) 2- and 4-cell SGs no longer transcribe *nos* but inherit *nos*  
390 mRNA, and thus produce Nos protein. 3)  $\geq 8$ -cell SGs to not transcribe *nos* mRNA, and  
391 translation of inherited *nos* mRNA is inhibited by Me31B, leading to overall  
392 downregulation of Nos protein. Loss of Me31B leads to increased translation of *nos*  
393 mRNA and increased levels of Nos protein that perdure throughout differentiation,  
394 promoting dedifferentiation at later stages.

395

### 396 **Discussion**

397 Stem cell maintenance is critically important for long-term tissue homeostasis.  
398 Despite their ability to self-renew, stem cells are not immortal and their life span is often  
399 shorter than that of the organism. Dedifferentiation can replenish stem cell pools via  
400 conversion of more differentiated cells back into stem cell identity. However,  
401 uncontrolled dedifferentiation can lead to tumorigenesis (Landsberg et al., 2012;  
402 Schwitalla et al., 2013), thus proper control of dedifferentiation must be essential.  
403 Despite its importance, the mechanisms that regulate dedifferentiation are poorly  
404 understood.

405  
406 This study identified *me31B* as a previously unknown and key negative regulator  
407 of dedifferentiation through its ability to regulate *nos* mRNAs. Both *nos* and *bam*  
408 mRNAs co-immunoprecipitated with Me31B-GFP (Figure 3G). Me31B may reinforce the  
409 known antagonistic relationship between *nos* and *bam* germline (Chen and McKearin,  
410 2005; Li et al., 2009) by independently regulating these transcripts (Figure 6C). In  
411 addition to extending Nos protein expression to 8-cell SGs and delaying Bam protein  
412 expression during germline development, depletion of *me31B* resulted in upregulation of  
413 BMP signaling, leading to an increased frequency of dedifferentiating SG cysts (Figure  
414 2). It remains unknown whether *me31B* directly regulates any components of BMP  
415 signaling. However, given the antagonistic relationship between *nos* and *bam*, and that  
416 BMP signaling represses *bam* expression (Chen and McKearin, 2003a, 2005; Chen and  
417 McKearin, 2003b; Harris et al., 2011; Li et al., 2012; Li et al., 2009; Song et al., 2004;  
418 Wang and Lin, 2004), it is possible that BMP upregulation can be explained as a  
419 downstream effect of misregulated *nos* and/or *bam*.

420  
421 It remains elusive what controls *me31B* to promote differentiation and/or prevent  
422 dedifferentiation. Is *me31B* downregulated by conditions that trigger dedifferentiation?  
423 We did not observe any changes in Me31B-GFP protein level or localization when  
424 dedifferentiation was artificially induced by transient expression of Bam (not shown). In  
425 future studies, it will be of interest to investigate whether Me31B senses niche vacancy  
426 (missing GSCs) to trigger dedifferentiation of SGs.

427  
428 The right balance of differentiation and dedifferentiation must be achieved to  
429 ensure maintenance of the stem cell pool, while minimizing the risk of tumorigenesis.  
430 The results presented in this study suggest that SGs are in a state of transitioning from  
431 stem cell identity to full commitment to differentiation. Whereas GSCs produce Nos  
432 protein via *nos* mRNA transcription and its translation, 2- and 4-cell SGs produce Nos  
433 protein only via translation of inherited *nos* mRNA. We propose that 2- and 4-cell SGs  
434 represent a critical cell population that is not yet fully committed to differentiation, as  
435 they still have Nos protein like GSCs, but unlike GSCs they no longer transcribe *nos*  
436 (Figure 6C). These SGs may hit a perfect balance of Nos protein that maintains their

437 potential to dedifferentiate into GSCs as necessary, but prevents tumorigenesis by  
438 shutting down *nos* transcription. Indeed, 2- and 4-cell SGs are known to be most potent  
439 for dedifferentiation (Sheng and Matunis, 2011): although this was speculated to be  
440 mostly due to their physical proximity to the hub cells, it is also possible that their ‘Nos  
441 production state’ (actively producing Nos protein from inherited mRNA) is more suited  
442 for dedifferentiation than later SGs. We propose that stepwise transitions from the stem  
443 cell state to the differentiated state are key for maintaining the stem cell pool while  
444 preventing tumorigenesis. In summary, the present study provides a new insight into  
445 how gradual commitment to differentiation is ensured by transcriptional and translational  
446 control of a master regulator.

447

#### 448 **Acknowledgements**

449 We thank Bloomington *Drosophila* Stock Center, Developmental Studies Hybridoma  
450 Bank, and Drs. Dennis McKearin and Liz Gavis for reagents. We thank the Yamashita  
451 lab members and Dr. Angela Anderson (Life Science Editors) for discussion and/or  
452 comments on this manuscript. This research was supported by Howard Hughes Medical  
453 Institute (to Y.Y) and in part by the NIH Career Training in Reproductive Biology  
454 (5T32HD079342-04) (to L.S).

455

456

457 **Figures**

**Figure 1**

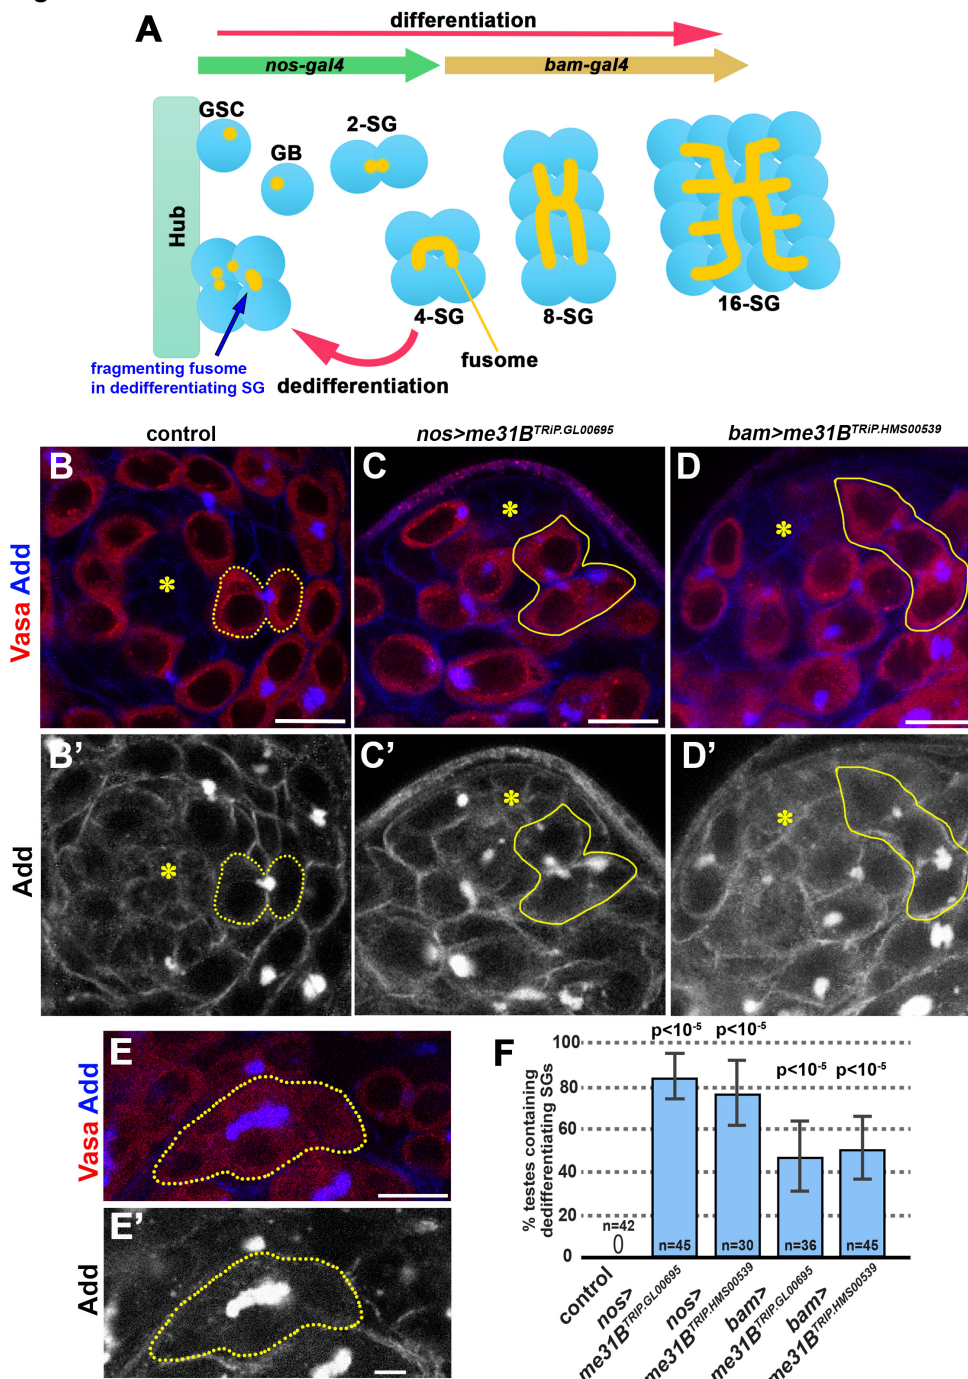

458

459

460

461

462

463

464

465

**Figure 1. Me31B knockdown leads to excessive dedifferentiation in the *Drosophila* testis.**

**A.** *Drosophila* spermatogenesis. Germline stem cells (GSCs) are attached to the hub cells, which provide signaling ligands required for GSC self-renewal. Asymmetric GSC division generates a GSC and a gonialblast (GBs) that undergo 4 rounds of mitotic divisions to create 2-, 4-, 8-, and 16-cell spermatogonia (SGs). 16-cell SGs then proceed to spermatocyte stage, then to meiosis to produce sperm (not depicted). SGs

466 can revert back to the GSC identity via dedifferentiation. During dedifferentiation, a  
467 cytoplasmic organelle called the fusome, which is normally a continuous structure that  
468 connects SGs, breaks apart. The fragmenting fusome in the dedifferentiating SG is  
469 indicated by a blue arrow. The *nos-gal4* driver is expressed in GSCs until the 4-cell  
470 SGs, whereas *bam-gal4* is expressed after the 4-cell SG stage. Note that RNAi initiated  
471 by *nos-gal4* typically perdures after *nos-gal4* expression ceases, due to persistence of  
472 RNAi (Bosch et al., 2016).

473 **B-D.** Apical tip of the testis stained for Vasa (red, germ cells) and Adducin-like (Add,  
474 blue, fusome) in controls (B), and *nos>me31B<sup>TRIP.GL00695</sup>* (C), and  
475 *bam>me31B<sup>TRIP.HMS00539</sup>* (D) knockdown lines. Note that both RNAi lines were similarly  
476 effective, and experiments were conducted using both RNAi lines (unless the genetics  
477 crosses were too complicated to generate a desired genotype). Throughout the  
478 manuscript, examples may be shown only with one RNAi construct, but the results were  
479 confirmed by using both constructs unless otherwise noted. Yellow dotted lines indicate  
480 GSC-GB pair (B), and yellow solid lines indicate dedifferentiating SG cyst (C, D). Note  
481 that fusomes are fragmented in dedifferentiating SG cysts (C, D). Bar: 10  $\mu$ m. Hub is  
482 indicated by the asterisks.

483 **E.** An example of a continuous fusome observed in differentiating SGs (a 4-cell cyst).

484 **F.** Frequency of testes (%) containing dedifferentiating SG cysts attached to the hub  
485 with  $\geq 3$  germ cells and fragmented fusomes in control vs. *me31B* knockdown testes. n =  
486 number of testes scored. p-value from Fisher's exact test is provided compared to  
487 control.

488

489

Figure 2

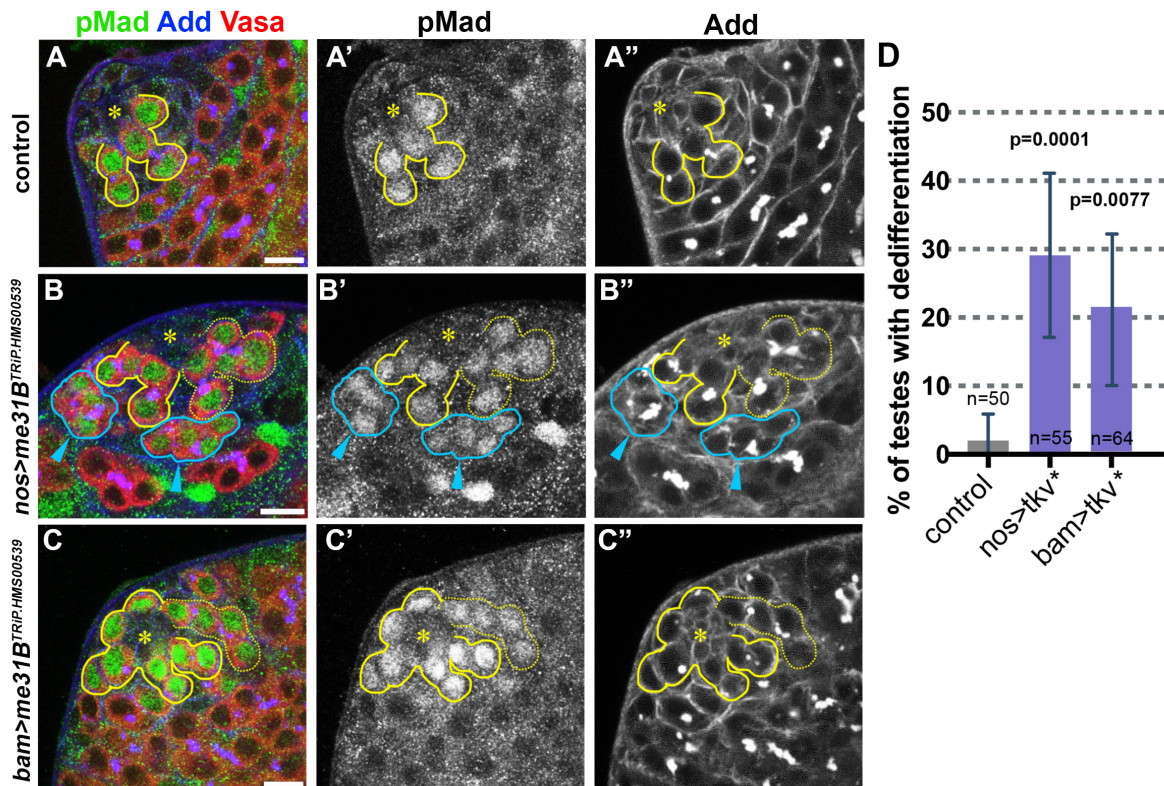

490

491 **Figure 2. BMP signaling is upregulated upon knockdown of *me31B***

492 A-C. Apical tip of the testes in control (A), *nos-gal4>me31B<sup>TRIP.HMS00539</sup>* (B), or *bam-*

493 *gal4> me31B<sup>TRIP.HMS00539</sup>* (C) stained for pMad (green), Vasa (red), and Adducin-like

494 (blue). Bar: 10 $\mu$ m. Hub is indicated by the asterisks. GSCs and connected GBs are

495 indicated by yellow lines. Dedifferentiating cysts that are attached to the hub are

496 indicated by yellow dotted lines. Dedifferentiating cysts that are not yet attached to the

497 hub are indicated by blue lines and arrowheads.

498 D. Ectopic expression of constitutive active Tkv (Tkv\*) either by *nos-gal4* driver or *bam-*

499 *gal4* driver results in elevated dedifferentiation. n=number of testes scored. p-value from

500 Fisher's exact test is provided compared to control.



Figure 3

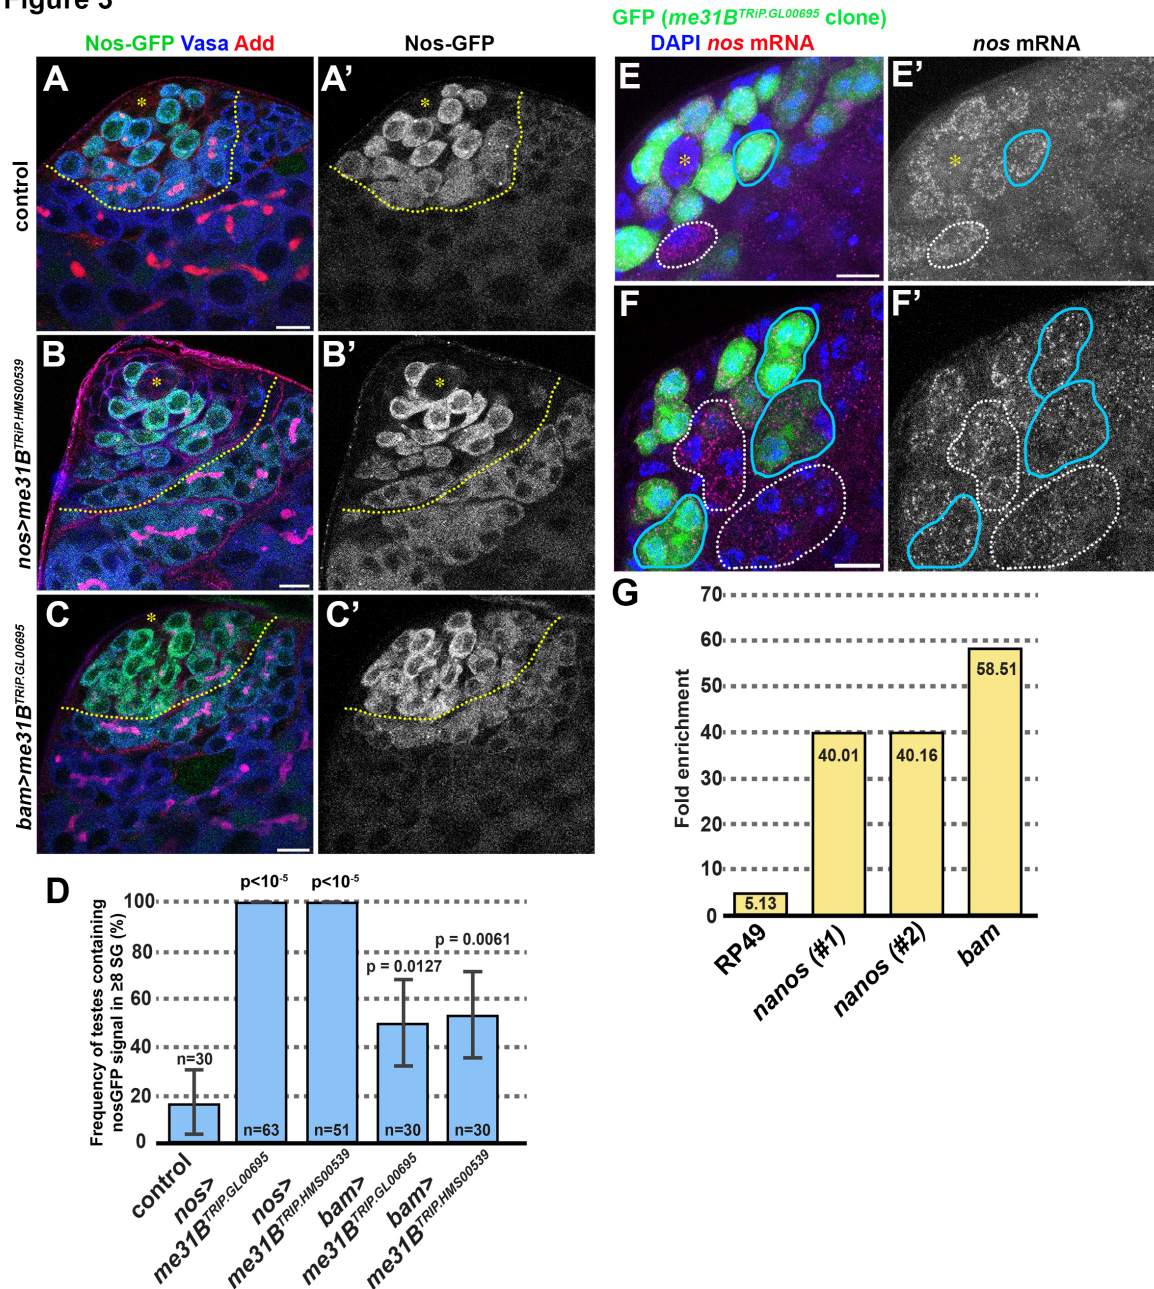

501

502 **Figure 3. Me31B binds to *nos* and *bam* mRNA to promote SG differentiation.**

503 A-C. Apical tip of the testes expressing *nos-GFP* under the control of endogenous  
 504 promoter and 3'UTR, stained for Vasa (blue) and Adducin-like (red). Control (A), *nos*  
 505 *>me31B<sup>TRIP.HMS00539</sup>* (B), or *bam>me31B<sup>TRIP.GL00695</sup>* (C). Bar: 10µm. Hub is indicated by  
 506 the asterisks. The boundary between 4-cell and 8-cell SGs is indicated by yellow dotted  
 507 lines.

508 D. The frequency of the testes that contains Nos-GFP-positive ≥8-cell SGs. n=number  
 509 of testes scored. p-value from Fisher's exact test is provided compared to control.

510 E, F. Apical tip of the testes probed for *nos* mRNA with single molecule RNA *in situ*  
 511 hybridization. GFP clones co-express *me31B<sup>TRIP.GL00695</sup>*, both driven by *nos-gal4*.

512 Examples of *me31B<sup>TRIP.GL00695</sup>* clone cysts are indicated by blue lines, and the wild type

513 (control) cysts are indicated by white dotted lines. (*hs-FLP, nos-FRT-stop-FRT-gal4,*  
514 *UAS-GFP, UAS-me31B<sup>TRIP.GL00695</sup>* flies were subjected to heat shock to activate *nos-*  
515 *gal4* to induce *me31B<sup>TRIP.GL00695</sup>* clones. See methods for details).  
516 G. Me31B-GFP RIP-qPCR probed for two sets of primers for *nos* mRNA and a primer  
517 set for *bam* mRNA, demonstrating that both *nos* mRNA and *bam* mRNA are highly  
518 enriched upon pulldown of Me31B-GFP protein.  
519  
520

Figure 4

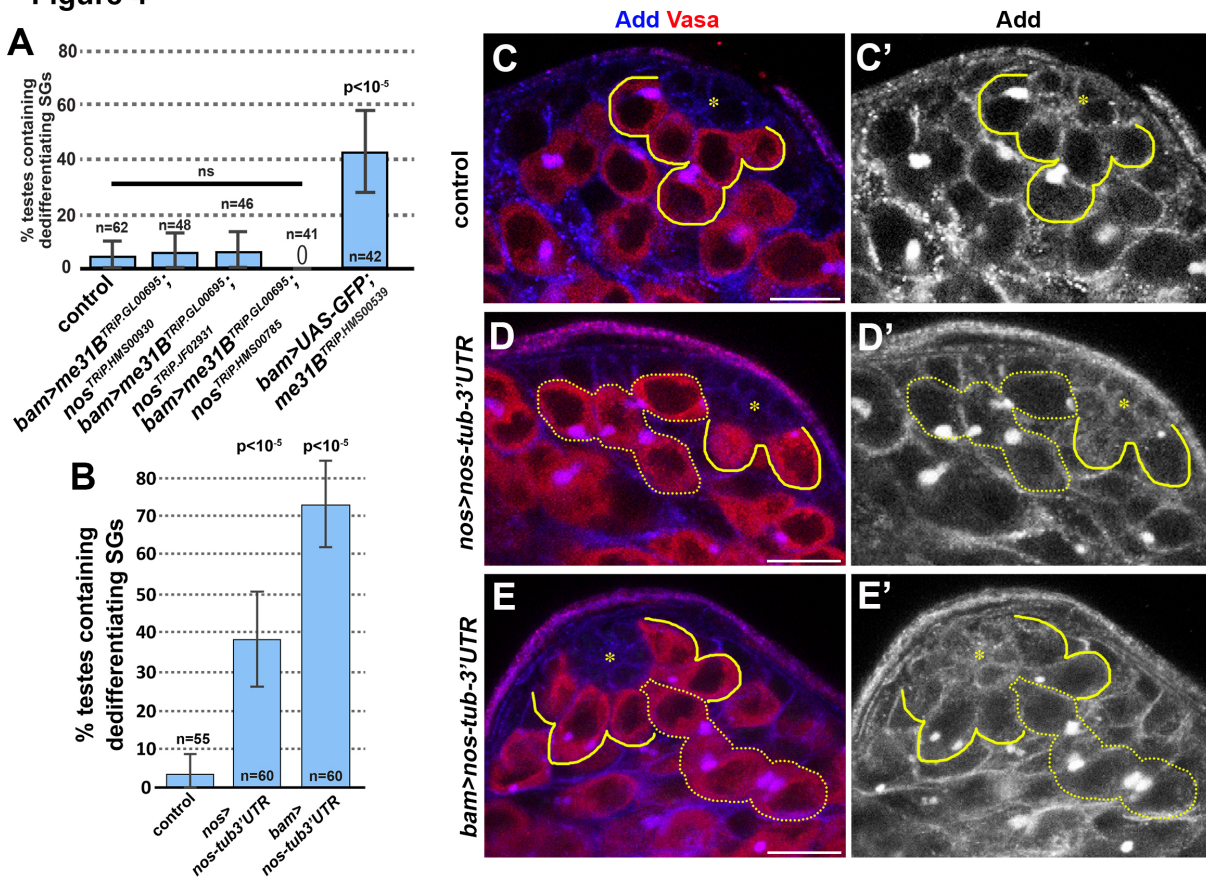

521

522

**Figure 4. *nos* is necessary and sufficient for dedifferentiation**

523 A. Frequency of testes containing dedifferentiating cysts in the indicated genotypes.  
 524 Knockdown of *nos* diminishes dedifferentiation due to *me31B* knockdown. n=number of  
 525 testes scored. p-value from Fisher's exact test is provided compared to control. ns: not  
 526 statistically significant ( $p > 0.5$ )

527 B. Frequency of testes containing dedifferentiating cysts upon ectopic expression of *nos*  
 528 with *tubulin 3'UTR* (*nos-tub3'UTR*) driven by *nos-gal4* or *bam-gal4*. p-value from  
 529 Fisher's exact test is provided compared to control.

530 C-E. Apical tip of testes from control testis (C), testis expressing *nos-tub3'UTR* by *nos-*  
 531 *gal4* (D) or *bam-gal4* (D). GSCs and connected GBs are indicated by solid yellow lines,  
 532 and dedifferentiating cysts are indicated by dotted yellow lines. Bar: 10 $\mu$ m. Hub is  
 533 indicated by the asterisks.

534

535

## Figure 5

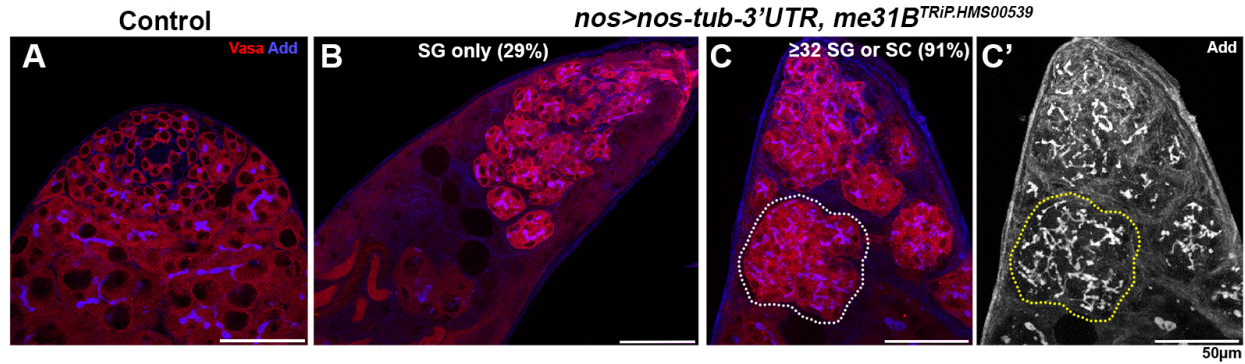

536  
537  
538  
539  
540  
541  
542  
543

### Figure 5. Combination of *nos* upregulation and *me31B* knockdown blocks differentiation.

A. Apical tip of the testes stained for Vasa (red) and Adducin-like (blue) in control (A), or *nos>nos-tub3'UTR, me31B<sup>TRIP.HMS00539</sup>* (B, C). A cyst that contains  $\gg 16$  SGs is indicated by dotted lines in C. Bar: 50µm.

## Figure 6

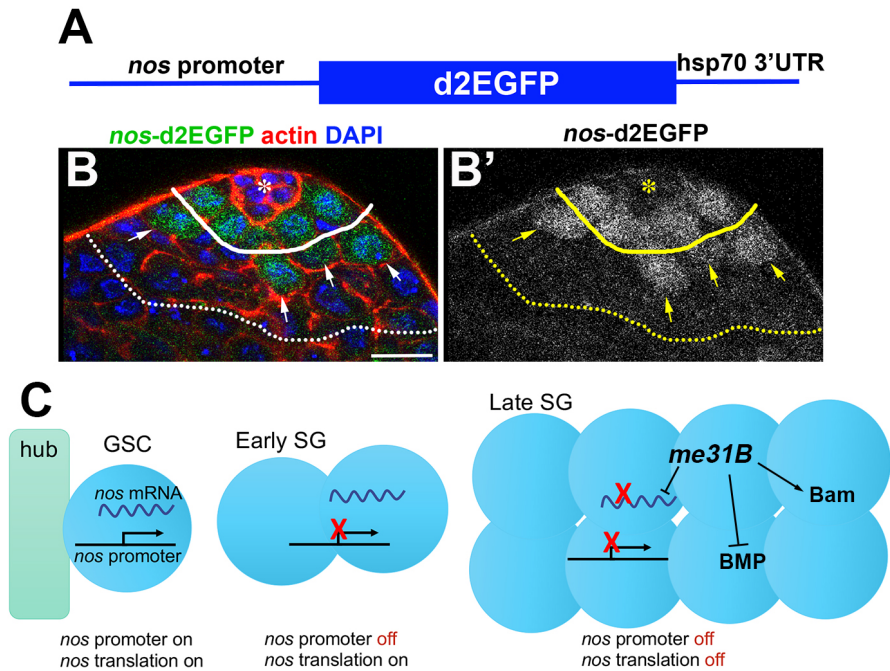

544

545

546

547

548

549

550

551

552

553

554

555

556

557

558

559

### Figure 6. *nos* is transcriptionally and translationally regulated during *Drosophila* spermatogenesis

A. Diagram of *nos* transcription reporter, where *nos* promoter drives unstable GFP protein and 3'UTR sequence from *hsp70*, which makes mRNA short-lived.

B. Apical tip of the testis expressing *nos* transcription reporter. GSC-GB boundary is indicated by solid line, and 4-cell/8-cell SG boundary is indicated by dotted line. GBs that are still connected to GSCs, thus still expressing *nos* transcription reporter are indicated by arrows. Bar: 10 $\mu$ m. Hub is indicated by the asterisk.

C. Model of *nos* regulation during germ cell development. In GSCs, the *nos* gene is transcribed and its mRNA is translated, leading to high Nos protein level and thus GSC maintenance. In early SGs, the *nos* gene is no longer transcribed, but Nos protein is produced via translation of inherited *nos* mRNA. In late SGs, the *nos* gene is no longer transcribed, and translation *nos* mRNA is inhibited by *me31B*. This leads to disappearance of Nos protein in these cells, promoting their differentiation.

## 560 **References**

- 561
- 562 Bosch, J.A., Sumabat, T.M., Hariharan, I.K., 2016. Persistence of RNAi-Mediated Knockdown in  
563 *Drosophila* Complicates Mosaic Analysis Yet Enables Highly Sensitive Lineage Tracing. *Genetics*  
564 203, 109-118.
- 565 Brawley, C., Matunis, E., 2004. Regeneration of male germline stem cells by spermatogonial  
566 dedifferentiation in vivo. *Science* 304, 1331-1334.
- 567 Chen, D., McKearin, D., 2003a. Dpp Signaling Silences bam Transcription Directly to Establish  
568 Asymmetric Divisions of Germline Stem Cells. *Curr Biol* 13, 1786-1791.
- 569 Chen, D., McKearin, D., 2005. Gene circuitry controlling a stem cell niche. *Curr Biol* 15, 179-184.
- 570 Chen, D., McKearin, D.M., 2003b. A discrete transcriptional silencer in the bam gene determines  
571 asymmetric division of the *Drosophila* germline stem cell. *Development* 130, 1159-1170.
- 572 Cheng, J., Turkel, N., Hemati, N., Fuller, M.T., Hunt, A.J., Yamashita, Y.M., 2008. Centrosome  
573 misorientation reduces stem cell division during ageing. *Nature* 456, 599-604.
- 574 de Sousa, E.M.F., de Sauvage, F.J., 2019. Cellular Plasticity in Intestinal Homeostasis and  
575 Disease. *Cell Stem Cell* 24, 54-64.
- 576 DeHaan, H., McCambridge, A., Armstrong, B., Cruse, C., Solanki, D., Trinidad, J.C., Arkov, A.L.,  
577 Gao, M., 2017. An in vivo proteomic analysis of the Me31B interactome in *Drosophila* germ  
578 granules. *FEBS Lett* 591, 3536-3547.
- 579 Fingerhut, J.M., Moran, J.V., Yamashita, Y.M., 2019. Satellite DNA-containing gigantic introns in  
580 a unique gene expression program during *Drosophila* spermatogenesis. *PLoS genetics* 15,  
581 e1008028.
- 582 Fuller, M.T., Spradling, A.C., 2007. Male and female *Drosophila* germline stem cells: two  
583 versions of immortality. *Science* 316, 402-404.
- 584 Gavis, E.R., Lehmann, R., 1992. Localization of nanos RNA controls embryonic polarity. *Cell* 71,  
585 301-313.
- 586 Gavis, E.R., Lehmann, R., 1994. Translational regulation of nanos by RNA localization. *Nature*  
587 369, 315-318.
- 588 Gotze, M., Dufourt, J., Ihling, C., Rammelt, C., Pierson, S., Sambrani, N., Temme, C., Sinz, A.,  
589 Simonelig, M., Wahle, E., 2017. Translational repression of the *Drosophila* nanos mRNA involves  
590 the RNA helicase Belle and RNA coating by Me31B and Trailer hitch. *RNA* 23, 1552-1568.
- 591 Harris, R.E., Pargett, M., Sutcliffe, C., Umulis, D., Ashe, H.L., 2011. Brat promotes stem cell  
592 differentiation via control of a bistable switch that restricts BMP signaling. *Dev Cell* 20, 72-83.
- 593 He, S., Nakada, D., Morrison, S.J., 2009. Mechanisms of stem cell self-renewal. *Annu Rev Cell*  
594 *Dev Biol* 25, 377-406.
- 595 Herrera, S.C., Bach, E.A., 2018. JNK signaling triggers spermatogonial dedifferentiation during  
596 chronic stress to maintain the germline stem cell pool in the *Drosophila* testis. *Elife* 7.
- 597 Jeske, M., Moritz, B., Anders, A., Wahle, E., 2011. Smaug assembles an ATP-dependent stable  
598 complex repressing nanos mRNA translation at multiple levels. *EMBO J* 30, 90-103.
- 599 Kawase, E., Wong, M.D., Ding, B.C., Xie, T., 2004. Gbb/Bmp signaling is essential for maintaining  
600 germline stem cells and for repressing bam transcription in the *Drosophila* testis. *Development*  
601 131, 1365-1375.
- 602 Kiger, A.A., Jones, D.L., Schulz, C., Rogers, M.B., Fuller, M.T., 2001. Stem cell self-renewal  
603 specified by JAK-STAT activation in response to a support cell cue. *Science* 294, 2542-2545.

604 Kugler, J.M., Chicoine, J., Lasko, P., 2009. Bicaudal-C associates with a Trailer Hitch/Me31B  
605 complex and is required for efficient Gurken secretion. *Dev Biol* 328, 160-172.

606 Kugler, J.M., Lasko, P., 2009. Localization, anchoring and translational control of oskar, gurken,  
607 bicoid and nanos mRNA during *Drosophila* oogenesis. *Fly* 3, 15-28.

608 Landsberg, J., Kohlmeyer, J., Renn, M., Bald, T., Rogava, M., Cron, M., Fatho, M., Lennerz, V.,  
609 Wolfel, T., Holzel, M., Tuting, T., 2012. Melanomas resist T-cell therapy through inflammation-  
610 induced reversible dedifferentiation. *Nature* 490, 412-416.

611 Lehmann, R., 2016. Germ Plasm Biogenesis--An Oskar-Centric Perspective. *Curr Top Dev Biol*  
612 116, 679-707.

613 Li, Y., Maines, J.Z., Tastan, O.Y., McKearin, D.M., Buszczak, M., 2012. Mei-P26 regulates the  
614 maintenance of ovarian germline stem cells by promoting BMP signaling. *Development* 139,  
615 1547-1556.

616 Li, Y., Minor, N.T., Park, J.K., McKearin, D.M., Maines, J.Z., 2009. Bam and Bgcn antagonize  
617 Nanos-dependent germ-line stem cell maintenance. *Proceedings of the National Academy of*  
618 *Sciences of the United States of America* 106, 9304-9309.

619 Liu, L., Qi, H., Wang, J., Lin, H., 2011. PAPI, a novel TUDOR-domain protein, complexes with  
620 AGO3, ME31B and TRAL in the nuage to silence transposition. *Development* 138, 1863-1873.

621 McDermott, S.M., Meignin, C., Rappsilber, J., Davis, I., 2012. *Drosophila* Syncrip binds the  
622 gurken mRNA localisation signal and regulates localised transcripts during axis specification.  
623 *Biol Open* 1, 488-497.

624 McKearin, D., Ohlstein, B., 1995. A role for the *Drosophila* bag-of-marbles protein in the  
625 differentiation of cystoblasts from germline stem cells. *Development* 121, 2937-2947.

626 McKearin, D.M., Spradling, A.C., 1990. bag-of-marbles: a *Drosophila* gene required to initiate  
627 both male and female gametogenesis. *Genes Dev* 4, 2242-2251.

628 Merrell, A.J., Stanger, B.Z., 2016. Adult cell plasticity in vivo: de-differentiation and  
629 transdifferentiation are back in style. *Nat Rev Mol Cell Biol* 17, 413-425.

630 Nakamura, A., Amikura, R., Hanyu, K., Kobayashi, S., 2001. Me31B silences translation of  
631 oocyte-localizing RNAs through the formation of cytoplasmic RNP complex during *Drosophila*  
632 oogenesis. *Development* 128, 3233-3242.

633 Nellen, D., Burke, R., Struhl, G., Basler, K., 1996. Direct and long-range action of a DPP  
634 morphogen gradient. *Cell* 85, 357-368.

635 Nystul, T.G., Spradling, A.C., 2006. Breaking out of the mold: diversity within adult stem cells  
636 and their niches. *Curr Opin Genet Dev* 16, 463-468.

637 Peter, D., Ruscica, V., Bawankar, P., Weber, R., Helms, S., Valkov, E., Igreja, C., Izaurralde, E.,  
638 2019. Molecular basis for GIGYF-Me31B complex assembly in 4EHP-mediated translational  
639 repression. *Genes Dev* 33, 1355-1360.

640 Schulz, C., Kiger, A.A., Tazuke, S.I., Yamashita, Y.M., Pantalena-Filho, L.C., Jones, D.L., Wood,  
641 C.G., Fuller, M.T., 2004. A misexpression screen reveals effects of bag-of-marbles and TGF beta  
642 class signaling on the *Drosophila* male germ-line stem cell lineage. *Genetics* 167, 707-723.

643 Schwitalla, S., Fingerle, A.A., Cammareri, P., Nebelsiek, T., Goktuna, S.I., Ziegler, P.K., Canli, O.,  
644 Heijmans, J., Huels, D.J., Moreaux, G., Rupec, R.A., Gerhard, M., Schmid, R., Barker, N., Clevers,  
645 H., Lang, R., Neumann, J., Kirchner, T., Taketo, M.M., van den Brink, G.R., Sansom, O.J., Arkan,  
646 M.C., Greten, F.R., 2013. Intestinal tumorigenesis initiated by dedifferentiation and acquisition  
647 of stem-cell-like properties. *Cell* 152, 25-38.

648 Sheng, X.R., Brawley, C.M., Matunis, E.L., 2009. Dedifferentiating spermatogonia outcompete  
649 somatic stem cells for niche occupancy in the *Drosophila* testis. *Cell Stem Cell* 5, 191-203.  
650 Sheng, X.R., Matunis, E., 2011. Live imaging of the *Drosophila* spermatogonial stem cell niche  
651 reveals novel mechanisms regulating germline stem cell output. *Development* 138, 3367-3376.  
652 Shivdasani, A.A., Ingham, P.W., 2003. Regulation of stem cell maintenance and transit  
653 amplifying cell proliferation by *tgf-Beta* signaling in *Drosophila* spermatogenesis. *Curr Biol* 13,  
654 2065-2072.  
655 Song, X., Wong, M.D., Kawase, E., Xi, R., Ding, B.C., McCarthy, J.J., Xie, T., 2004. *Bmp* signals  
656 from niche cells directly repress transcription of a differentiation-promoting gene, *bag of*  
657 *marbles*, in germline stem cells in the *Drosophila* ovary. *Development* 131, 1353-1364.  
658 Thomson, T., Liu, N., Arkov, A., Lehmann, R., Lasko, P., 2008. Isolation of new polar granule  
659 components in *Drosophila* reveals P body and ER associated proteins. *Mech Dev* 125, 865-873.  
660 Tulina, N., Matunis, E., 2001. Control of stem cell self-renewal in *Drosophila* spermatogenesis by  
661 JAK-STAT signaling. *Science* 294, 2546-2549.  
662 Wallenfang, M.R., Nayak, R., DiNardo, S., 2006. Dynamics of the male germline stem cell  
663 population during aging of *Drosophila melanogaster*. *Aging Cell* 5, 297-304.  
664 Wang, M., Ly, M., Lugowski, A., Laver, J.D., Lipshitz, H.D., Smibert, C.A., Rissland, O.S., 2017.  
665 ME31B globally represses maternal mRNAs by two distinct mechanisms during the *Drosophila*  
666 maternal-to-zygotic transition. *Elife* 6.  
667 Wang, Z., Lin, H., 2004. *Nanos* maintains germline stem cell self-renewal by preventing  
668 differentiation. *Science* 303, 2016-2019.  
669 Yamashita, Y.M., 2018. Subcellular Specialization and Organelle Behavior in Germ Cells.  
670 *Genetics* 208, 19-51.  
671 Yamashita, Y.M., Jones, D.L., Fuller, M.T., 2003. Orientation of asymmetric stem cell division by  
672 the APC tumor suppressor and centrosome. *Science* 301, 1547-1550.  
673
